# Supplementary material
Source: PubMed Central journal article supplement (PMC2871078)

serum starved

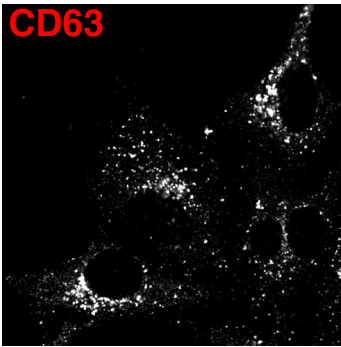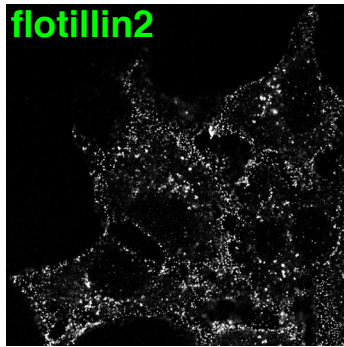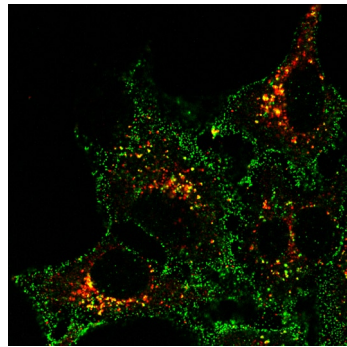

+ EGF 30min

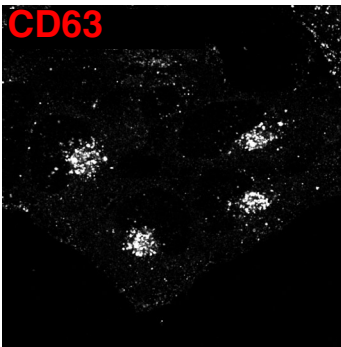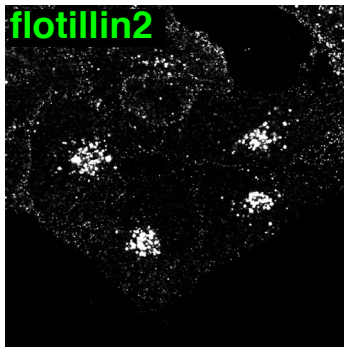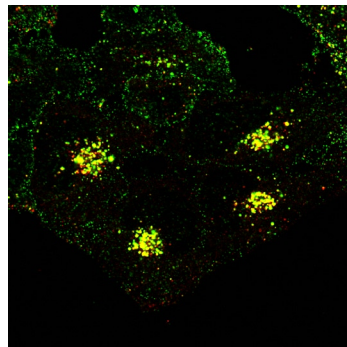

Supplement: jcs.039024_1.pdf [file jcs.039024_1.pdf]
